By means of the regulator dial, the desired pressure can be quickly and accurately adjusted, and that pressure will be maintained regardless of elapsed time or remaining volume in the unit. Rapid deflation is accomplished by uncoupling the leur-lock. We have used this system for more than two years without difficulty.

JORDAN WALDMAN, M.D.†  
*Associate Professor of Anesthesia  
Director of Anesthesia*

† Currently in private practice: 2875 Cliffridge Court, La Jolla, California 92037.

Anesthesiology  
50:74, 1979

### Husband Excluded during Induction of Anesthesia for Delivery

*To the Editor:*—I read with much concern about the presence of a husband during insertion of an epidural needle into the back of his wife, his subsequent fainting, and the fracture of his skull.<sup>1</sup> I trust that this is not regarded as standard procedure in American hospitals. In our institution where we have an average of more than 8,000 deliveries per year; 6,500 of the mothers have general anesthesia, spinal, epidural or caudal block, and the husband is not allowed to be present during the induction of any form of anesthesia or analgesia. It is, in our opinion, an unnecessary and unacceptable burden on both the husband and the anesthesiologist. It also has potential medicolegal implications. Only after anesthesia and vital signs have stabilized and are adequate is the husband allowed to come into the labor or delivery room.

Recently, there has been a growing interest in the presence of the husband with his wife during a cesarean section. It is believed that if the couple have attended the course of parental education and had planned to be together during a vaginal delivery, it is disturbing to the family to separate them only because of the method of delivery. Therefore, in our institution, the husband is allowed to attend during a cesarean section, but only when spinal or epidural analgesia is employed. Furthermore, he is brought to the operating room after the analgesia is adequate, when no vomiting or nausea is present,

Anesthesiology  
50:74-75, 1979

*In reply:*—In contradistinction to Dr. Abouleish, I do trust that allowing properly trained husbands to remain in the room during the administration of epidural anesthesia is standard practice in American

*Mott Children's Hospital  
University of Michigan  
Ann Arbor, Michigan 48104*

THOMAS REBANE, M.D., PH.D.‡  
*Chief Resident  
Department of Anesthesia  
University of Michigan  
Ann Arbor, Michigan 48104*

‡ Currently in private practice: 3121 South Maryland Parkway, Suite 220, Las Vegas, Nevada 89109.

(Accepted for publication July 24, 1978.)

and when the vital signs are stable. He is required to sit at the head of the table in a position from which he cannot observe the operative field. Such a policy has been reached after a pilot study was performed in our institution. In this study the couples were questioned by a psychiatrist and the feelings of the obstetricians, anesthesiologists, and nurses were reported. The conclusion of the study was that the couples gratefully accepted it and considered it an important achievement. The staff, however, including the author, had mixed feelings. The majority considered it an inconvenience, but not much greater an inconvenience than that involved in the husband's attending a vaginal delivery. On the whole, the procedure is not particularly encouraged, but when requested, it is usually honored.

EZZAT ABOULEISH, M.D.  
*Director of Obstetric Anesthesia  
Magee-Womens Hospital  
Associate Professor of Anesthesiology  
University of Pittsburgh School of Medicine  
Forbes Avenue and Halket Street  
Pittsburgh, Pennsylvania 15213*

#### REFERENCE

1. DeVore JS, Asrani R: Paternal fractured skull as a complication of obstetric anesthesia. *ANESTHESIOLOGY* 48:386, 1978

(Accepted for publication July 25, 1978.)

hospitals. With an experience of thousands of deliveries at four different teaching institutions, we have found that when the husband has been with his wife during early labor, has been supportive, and

wishes to remain during the administration of the epidural anesthesia, he can generally be of much help in the administration of the anesthetic. He is never forced to stay, and we have generally found that those husbands who are squeamish about needles will choose to leave the room when the epidural is administered. The case in question is the only complication that we have seen in our experience, and that was why we reported it. We believe that we have passed the point where we can arbitrarily exclude the father from any part of labor and delivery unless it can be shown that it is of detriment to patient care.

We are just beginning our experience with fathers being present during cesarean sections. We, too, experienced some discomfort with this idea, but feel that this is an important part of the delivery of obstetric care. It is rather surprising, however, that Dr. Abouleish finds it perfectly acceptable for a father to be present during a cesarean section but not for administration of epidural anesthesia. It is the attempt by modern hospital-based physicians to

exclude fathers from the experience of labor and delivery that has led to the alarming recent trend towards home deliveries, with their inherently high complication rate. We would hope that all of us in the perinatal field would take every opportunity to make the childbirth experience as rewarding as possible for all parties concerned, so that patients will accept necessary constraints of hospital delivery to maximize patient safety.

JAY S. DEVORE, M.D.  
*Assistant Professor of Anesthesiology  
and Obstetrics and Gynecology  
Director of Obstetric Anesthesia*

RAJKUMARI V. ASRANI, M.D.  
*Assistant Clinical Professor of Anesthesiology  
Department of Anesthesiology  
California College of Medicine  
University of California, Irvine  
Orange, California 92668*

*(Accepted for publication July 25, 1978.)*

Anesthesiology  
50:75, 1979

### Prevention of Hypoxic Gas Concentrations

*To the Editor:*—In a recent letter to the editor (ANESTHESIOLOGY 48:152–153, 1978), Levin and Balasaraswathi stated only one model of anesthesia machine contains an actual fail-safe mechanism. The machine referred to, Foregger Model 710, does not prevent the delivery of a hypoxic gas mixture. There are several methods available to help prevent the delivery of hypoxic anesthetic gas mixtures. One is the so-called low-pressure “fail-safe” system, which employs a master pressure valve in the oxygen supply line. When the oxygen supply pressure falls below 40 psi the master valve closes, causing the slave pressure valve on the other anesthetic gas supply lines to close also. Thus, when the source of oxygen pressure falls below 40 psi no anesthetic gas can be delivered. The authors correctly state this system does not prevent the delivery of hypoxic gas mixtures, so long as a source of oxygen is available, because it does not guarantee an adequate oxygen concentration.

The Model 710 attempts to correct this deficiency by requiring a fixed minimum oxygen flow (preset at the factory to the customer's specification) before other anesthetic gases will flow. When this fixed minimum oxygen flow is set low (*e.g.*, between 0.250 and 1.0 l/min), a hypoxic gas mixture can be delivered with only modest anesthetic gas flows (*i.e.*, greater

than 0.95 and 3.8 l/min, respectively). When the fixed minimum oxygen flow is set high, *e.g.*, 21 per cent of the anesthesia machine's maximum total gas flow, high gas flows are required routinely. The solution to this dilemma is a device that provides a variable minimum oxygen flow in proportion to the total gas flow; the ratiometer is such a device.

The ratiometer,\* preset to deliver 21 per cent or more oxygen, is the only method currently available for preventing the delivery of a hypoxic gas mixture. This device ordinarily is preset to deliver 30 to 100 per cent oxygen with the balance inert gas (*e.g.*, nitrous oxide) at total flows of 1 to 20 l/min. The ratiometer is not dependent on flow rates and, when combined with a low-pressure “fail-safe” system, precludes delivery of a hypoxic anesthetic gas mixture.

EUGENE K. BETTS, M.D.  
*Assistant Professor of Anesthesia at the  
Children's Hospital of Philadelphia  
University of Pennsylvania School of Medicine  
Philadelphia, Pennsylvania 19104*

\* M.D.M. Flowmeter (Cyprane North American, Inc.); 30/70 Proportioner (Ohio Medical Products).

*(Accepted for publication July 25, 1978.)*
